# Supplementary material for: A rhodamine-benzimidazole based sensor for selective imaging of acidic pH
Source: Royal Society of Chemistry journal article supplement (doi:10.1039/c3ra45329d), 2013-11-04
Supplement: c3ra45329d.pdf [file c3ra45329d.pdf]

## Supporting Information

### A rhodamine-benzimidazole based sensor for selective imaging of acidic pH

Zhongwei Xue,<sup>1</sup> Mingliang Chen,<sup>2</sup> Jianming Chen,<sup>2</sup> Jiahuai Han,<sup>3</sup> and Shoufa Han<sup>1,\*</sup>

<sup>1</sup>Department of Chemical Biology, College of Chemistry and Chemical Engineering, the Key Laboratory for Chemical Biology of Fujian Province and The MOE Key Laboratory of Spectrochemical Analysis & Instrumentation;

<sup>2</sup>The Third Marine Research Institute, State Oceanic Administration, 184 University Road, Xiamen;

<sup>3</sup>State key Laboratory of Cellular Stress Biology and School of Life Sciences, Xiamen University, Xiamen, Fujian 361005, China;  
Tel: 86-0592-2181728; E-mail: shoufa@xmu.edu.cn

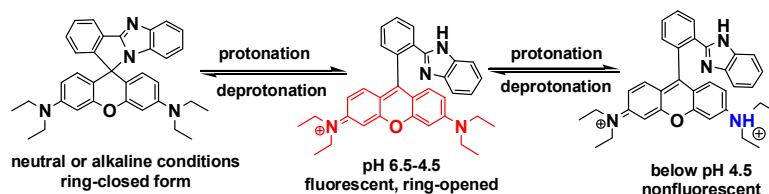

**Scheme S1.** Successive protonation of RB-IM at acidic media. RB-IM is poised to proton triggered fluorogenic opening of the intramolecular ring at lysosomal pH. At pH<4.5, the ring-opened form of RB-IM could be further protonated (shown in blue), which leads to decreased fluorescence emission. In contrast, acidic pH (pH <4.5) would even further promote ring-opening of RB-IM and has no effects on UV-vis absorbance of ring-opened RB-IM (Fig. 1d).

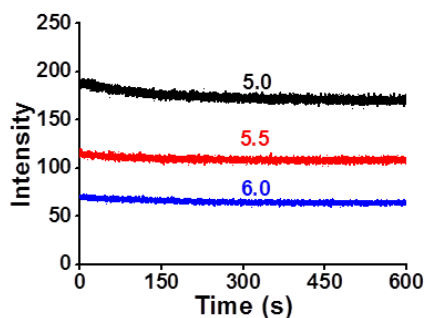

**Fig. S1** Kinetic profiles pH responses of RB-IM. RB-IM was spiked into  $\text{Na}_2\text{HPO}_4\text{-NaH}_2\text{PO}_4$  buffer (200 mM, pH 5.0, 5.5, 6.0) to a final concentration of 10  $\mu\text{M}$ . The color formation of the solutions was monitored over time by fluorescence emission intensity at 590 nm ( $\text{Ex}@560$  nm).

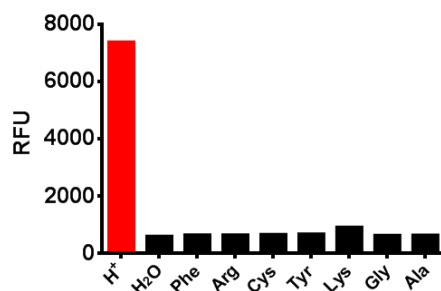

**Fig. S2** Selectivity of RB-IM for selected amino acids. RB-IM (10  $\mu\text{M}$ ) was spiked into water or a serial of  $\text{NaH}_2\text{PO}_4\text{-Na}_2\text{HPO}_4$  buffer (200 mM, pH 7.0) containing amino acids (1 mM) as indicated. Fluorescence emission at 595 nm of the resultant solutions was recorded using  $\lambda_{\text{ex}}$  at 565 nm.
